# Supplementary material
Source: PubMed Central journal article supplement (PMC6238640)
Supplement: NIHMS993703-supplement-Supporting_Information.pdf [file NIHMS993703-supplement-Supporting_Information.pdf]

## Supporting Information

### **Decoupling the functional roles of cationic and hydrophobic groups in the antimicrobial and hemolytic activities of methacrylate random copolymers**

Authors: Hamid Mortazavian<sup>1</sup>, Leanna L. Foster<sup>2</sup>, Rajani Bhat<sup>1</sup>, Shyrie Patel<sup>1</sup>, Kenichi Kuroda<sup>1,2\*</sup>

1) Department of Biologic and Materials Sciences, School of Dentistry, University of Michigan, Ann Arbor, MI 48176.

2) Macromolecular Science and Engineering Center, University of Michigan, Ann Arbor, MI 48176.

\*corresponding author

1. <sup>1</sup>H NMR spectrum of AE34HE29E37 and assignments
2. Polymer characterization, MIC (*E. coli*) and hemolysis

1.  $^1\text{H}$  NMR spectrum of AE34HE29E37 and assignments

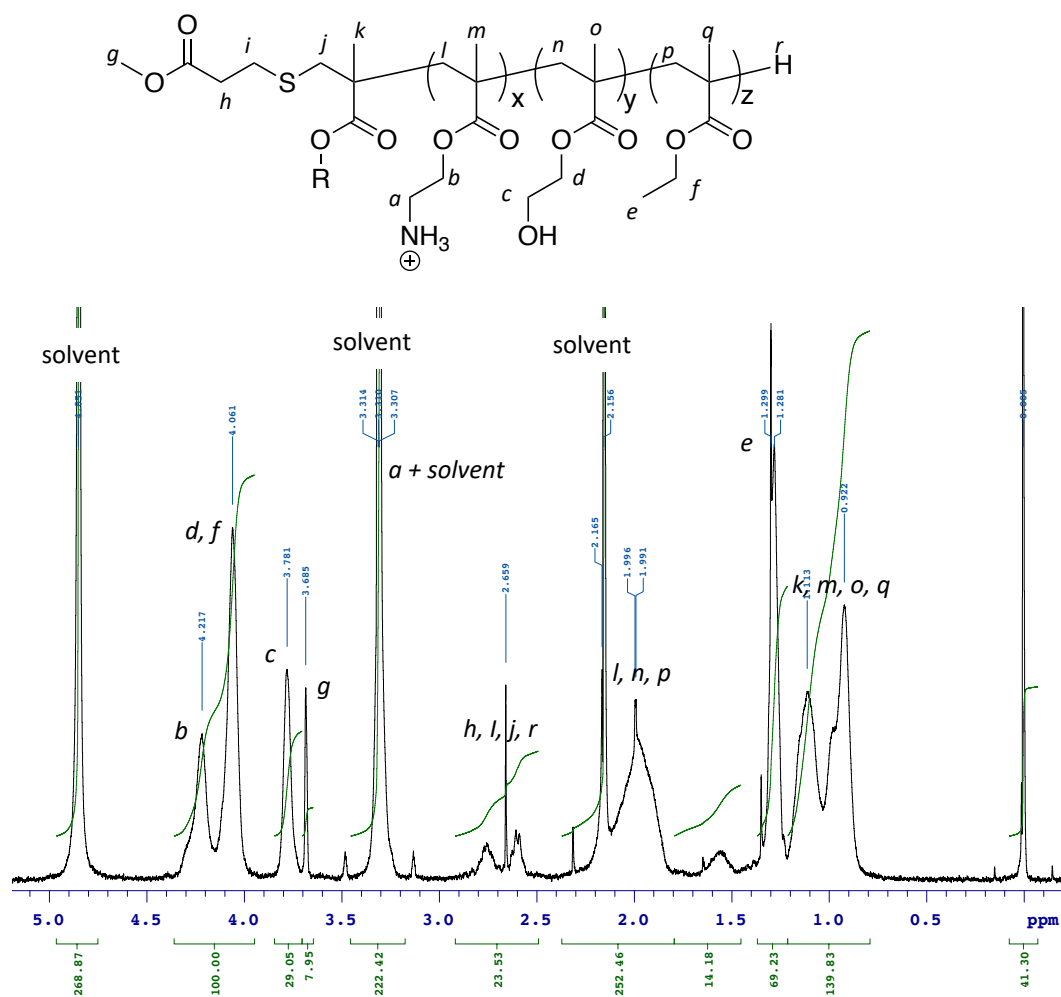

**Fig. S1.**  $^1\text{H}$  NMR of AE34HE29E37.

The DP and mol. % of monomers were determined by the following calculations:

$$\text{DP} = 100/2 (b, d, f) / 7.95/3 (g) = 19$$

$$\text{HEMA} = 29.05 (c) / 100 (b, d, f) = 29 \text{ mol.}\%$$

$$\text{AEMA} = b / (b + d + f) = 27.5 \text{ mm} / (27.5\text{mm} + 53 \text{ mm})^* = 34 \text{ mol.}\% \text{ (* the heights of integration curve)}$$

$$\text{EMA} = 100 \text{ mol.}\% - 29 \text{ mol.}\% (\text{HEMA}) - 34 \text{ mol.}\% (\text{AEMA}) = 37 \text{ mol.}\%$$

2. Polymer characterization, MIC (*E. coli*) and hemolysis

**Table S1. Characterization of de-protected copolymers with EMA 0 mol. %**

| Polymer | HEMA <sup>a</sup><br>(mol. %) | AEMA <sup>a</sup><br>(mol. %) | EMA <sup>a</sup><br>(mol. %) | DP | $M_n$<br>(NMR)<br>w/TFA | $M_n$<br>(NMR)<br>w/o<br>TFA | MIC<br><i>E. coli</i><br>( $\mu\text{g/mL}$ ) |
|---------|-------------------------------|-------------------------------|------------------------------|----|-------------------------|------------------------------|-----------------------------------------------|
| 1       | 22 (20)                       | 78 (80)                       | 0 (0)                        | 14 | 3200                    | 2000                         | >1000                                         |
| 2       | 38 (40)                       | 62 (60)                       | 0 (0)                        | 16 | 3300                    | 2200                         | >1000                                         |
| 3       | 59 (60)                       | 41 (40)                       | 0 (0)                        | 19 | 3400                    | 2600                         | >1000                                         |
| 4       | 75 (80)                       | 25 (20)                       | 0 (0)                        | 10 | 1700                    | 1400                         | >1000                                         |
| 5       | 100<br>(100)                  | 0 (0)                         | 0 (0)                        | 23 | 3100                    | 3100                         | >1000                                         |

a) The values of mol. % of TMS-HEMA, Boc-AEMA, EMA (feed compositions) are given in parentheses.

**Table S2. Characterization of de-protected copolymers with EMA 10 mol. %**

| Polymer | HEMA <sup>a</sup><br>(mol. %) | AEMA <sup>a</sup><br>(mol. %) | EMA <sup>a</sup><br>(mol. %) | DP   | $M_n$<br>(NMR)<br>w/TFA | $M_n$<br>(NMR)<br>w/o<br>TFA | MIC<br><i>E. coli</i><br>( $\mu\text{g/mL}$ ) |
|---------|-------------------------------|-------------------------------|------------------------------|------|-------------------------|------------------------------|-----------------------------------------------|
| 6       | 0 (0)                         | 87.7 (90)                     | 12.3 (10)                    | 14.9 | 3510                    | 2030                         | >1000                                         |
| 7       | 16 (15)                       | 71 (75)                       | 13 (10)                      | 14.4 | 3120                    | 1970                         | >1000                                         |
| 8       | 28.2 (30)                     | 58.9 (60)                     | 12.9 (10)                    | 19.8 | 3970                    | 2660                         | >1000                                         |
| 9       | 43.6 (45)                     | 44 (45)                       | 12.4 (10)                    | 19.3 | 3550                    | 2590                         | >1000                                         |
| 10      | 55.9 (60)                     | 33.7 (30)                     | 10.4 (10)                    | 20.6 | 3550                    | 2770                         | >1000                                         |
| 11      | 72.4 (75)                     | 16.7 (15)                     | 10.9 (10)                    | 21.6 | 3300                    | 2890                         | >1000                                         |
| 12      | 90.1 (90)                     | 0 (0)                         | 9.9 (10)                     | 19.5 | 2630                    | 2630                         | >1000                                         |

a) The values of mol. % of TMS-HEMA, Boc-AEMA, EMA (feed compositions) are given in parentheses.

**Table S3. Characterization of de-protected copolymers with EMA 20 mol. %**

| Polymer | HEMA <sup>a</sup><br>(mol. %) | AEMA <sup>a</sup><br>(mol. %) | EMA <sup>a</sup><br>(mol. %) | DP   | $M_n$<br>(NMR)<br>w/TFA | $M_n$<br>(NMR)<br>w/o<br>TFA | MIC<br><i>E. coli</i><br>( $\mu\text{g/mL}$ ) |
|---------|-------------------------------|-------------------------------|------------------------------|------|-------------------------|------------------------------|-----------------------------------------------|
| 13      | 0 (0)                         | 79.5 (80)                     | 20.5 (20)                    | 17.4 | 3890                    | 2330                         | 830 $\pm$ 290                                 |
| 14      | 11.8 (10)                     | 67.9 (70)                     | 20.3 (20)                    | 17.9 | 3770                    | 2390                         | 830 $\pm$ 290                                 |
| 15      | 20.9 (20)                     | 58.6 (60)                     | 20.5 (20)                    | 17.8 | 3560                    | 2380                         | 1000                                          |
| 16      | 31 (30)                       | 49.5 (50)                     | 19.5 (20)                    | 18.4 | 3490                    | 2460                         | 1000                                          |
| 17      | 39.5 (40)                     | 40.7 (40)                     | 19.8 (20)                    | 15.9 | 2870                    | 2140                         | 1000                                          |
| 18      | 49.7 (50)                     | 32.1 (30)                     | 18.2 (20)                    | 18.2 | 3100                    | 2440                         | 1000                                          |

|    |           |           |           |      |      |      |        |
|----|-----------|-----------|-----------|------|------|------|--------|
| 19 | 59 (60)   | 22.4 (20) | 18.6 (20) | 20.6 | 3260 | 2740 | 1000   |
| 20 | 68.9 (70) | 13.8 (10) | 17.3 (20) | 19.1 | 2850 | 2550 | > 1000 |
| 21 | 82.3 (80) | 0 (0)     | 17.7 (20) | 28   | 4320 | 3760 | > 1000 |

a) The values of mol. % of TMS-HEMA, Boc-AEMA, EMA (feed compositions) are given in parentheses.

**Table S4. Characterization of de-protected copolymers with EMA 30 mol. %**

| Polymer | HEMA <sup>a</sup><br>(mol. %) | AEMA <sup>a</sup><br>(mol. %) | EMA <sup>a</sup><br>(mol. %) | DP   | $M_n$<br>(NMR)<br>w/TFA | $M_n$<br>(NMR)<br>w/o<br>TFA | MIC<br><i>E. coli</i><br>( $\mu\text{g/mL}$ ) |
|---------|-------------------------------|-------------------------------|------------------------------|------|-------------------------|------------------------------|-----------------------------------------------|
| 22      | 0 (0)                         | 68.9 (70)                     | 31.1 (30)                    | 16.1 | 3390                    | 2140                         | 250                                           |
| 23      | 9.2 (7)                       | 59.5 (63)                     | 31.3 (30)                    | 16.4 | 3280                    | 2170                         | 250                                           |
| 24      | 14.9 (14)                     | 53.2 (56)                     | 31.9 (30)                    | 17.5 | 3360                    | 2310                         | 250                                           |
| 25      | 20.5 (21)                     | 46.8 (49)                     | 32.7 (30)                    | 17.9 | 3300                    | 2360                         | 250                                           |
| 26      | 27 (28)                       | 41.3 (42)                     | 31.7 (30)                    | 18.4 | 3280                    | 2420                         | 250                                           |
| 27      | 32.3 (35)                     | 34.6 (35)                     | 33.1 (30)                    | 19.1 | 3250                    | 2510                         | 210 $\pm$ 72                                  |
| 28      | 38.5 (42)                     | 28.6 (28)                     | 32.9 (30)                    | 19   | 3110                    | 2490                         | 125                                           |
| 29      | 47.8 (49)                     | 18.4 (21)                     | 33.8 (30)                    | 21.3 | 3220                    | 2780                         | 250                                           |
| 30      | 56.2 (56)                     | 10.8 (14)                     | 33 (30)                      | 20.1 | 2880                    | 2630                         | 500                                           |
| 31      | 61.7 (63)                     | 6.1 (7)                       | 32.2 (30)                    | 21.2 | 2920                    | 2770                         | >1000                                         |
| 32      | 62.3 (70)                     | 0 (0)                         | 37.7 (30)                    | 11.7 | 1570                    | 1570                         | >1000                                         |

a) The values of mol. % of TMS-HEMA, Boc-AEMA, EMA (feed compositions) are given in parentheses.

**Table S5. Characterization of de-protected copolymers with EMA 40 mol. %**

| Polymer | HEMA <sup>a</sup><br>(mol. %) | AEMA <sup>a</sup><br>(mol. %) | EMA <sup>a</sup><br>(mol. %) | DP    | $M_n$<br>(NMR)<br>w/TFA | $M_n$<br>(NMR)<br>w/o TFA | MIC<br><i>E. coli</i><br>( $\mu\text{g/mL}$ ) | HC <sub>50</sub><br>( $\mu\text{g/mL}$ ) |
|---------|-------------------------------|-------------------------------|------------------------------|-------|-------------------------|---------------------------|-----------------------------------------------|------------------------------------------|
| 33      | 0 (0)                         | 60.1 (60)                     | 39.9 (40)                    | 14.51 | 2900                    | 1920                      | 31                                            | 1000                                     |
| 34      | 11.9 (10)                     | 50.7 (50)                     | 37.4 (40)                    | 14.44 | 2740                    | 1910                      | 31                                            | 1000                                     |
| 35      | 21.4 (20)                     | 42.5 (40)                     | 36.1 (40)                    | 15.56 | 2800                    | 2060                      | 42 $\pm$ 18                                   | 1000                                     |
| 36      | 29 (30)                       | 34.1 (30)                     | 36.9 (40)                    | 18.87 | 3190                    | 2470                      | 31                                            | 1000                                     |
| 37      | 39.8 (40)                     | 23.3 (20)                     | 36.9 (40)                    | 14.78 | 2350                    | 1960                      | 63                                            | (41% at<br>1000 $\mu\text{g/mL}$ )       |
| 38      | 40.3 (50)                     | 13.4 (10)                     | 46.3 (40)                    | 13.25 | 1950                    | 1750                      | 1000                                          | (5% at<br>1000 $\mu\text{g/mL}$ )        |
| 39      | 57.7 (60)                     | 0 (0)                         | 42.3 (40)                    | 12.53 | 1670                    | 1670                      | >1000                                         | (5% at<br>1000 $\mu\text{g/mL}$ )        |

a) The values of mol. % of TMS-HEMA, Boc-AEMA, EMA (feed compositions) are given in parentheses.

**Table S6. Characterization of de-protected copolymers with EMA 50 mol. %**

| Polymer | HEMA <sup>a</sup><br>(mol. %) | AEMA <sup>a</sup><br>(mol. %) | EMA <sup>a</sup><br>(mol. %) | DP    | $M_n$<br>(NMR)<br>w/TFA | $M_n$<br>(NMR)<br>w/o<br>TFA | MIC<br>E.coli<br>( $\mu\text{g/mL}$ ) | HC <sub>50</sub><br>( $\mu\text{g/mL}$ ) |
|---------|-------------------------------|-------------------------------|------------------------------|-------|-------------------------|------------------------------|---------------------------------------|------------------------------------------|
| 40      | 0 (0)                         | 49.1<br>(50)                  | 50.9<br>(50)                 | 19.4  | 3560                    | 2490                         | 15.62                                 | 19 $\pm$ 8.2                             |
| 41      | 8.1 (7.5)                     | 44.7<br>(42.5)                | 47.2<br>(50)                 | 19.6  | 3510                    | 2520                         | 15.62                                 | 28 $\pm$ 8.8                             |
| 42      | 14.9<br>(15)                  | 38.1<br>(35)                  | 47 (50)                      | 20.06 | 3440                    | 2580                         | 15.62                                 | 28 $\pm$ 11                              |
| 43      | 21.7<br>(23)                  | 32.3<br>(50)                  | 46 (50)                      | 23.9  | 3930                    | 3060                         | 13 $\pm$ 4.5                          | 42 $\pm$ 16                              |
| 44      | 30.1<br>(30)                  | 23.6<br>(20)                  | 46.3<br>(50)                 | 25.2  | 3890                    | 3210                         | 26 $\pm$ 9.0                          | 94 $\pm$ 32                              |
| 45      | 39.6<br>(37.5)                | 16.7<br>(12.5)                | 43.7<br>(50)                 | 25.1  | 3690                    | 3210                         | 125                                   | 309 $\pm$ 32                             |
| 46      | 45.3<br>(45)                  | 8.1 (5)                       | 46.6<br>(50)                 | 14.2  | 1990                    | 1860                         | >1000                                 | 7.5 $\pm$ 6.9                            |
| 47      | 49.7<br>(50)                  | 0 (0)                         | 50.3<br>(50)                 | 16.1  | 2090                    | 2090                         | >1000                                 | 4.7 $\pm$ 3.9                            |

a) The values of mol. % of TMS-HEMA, Boc-AEMA, EMA (feed compositions) are given in parentheses.
